# Supplementary material for: De novo prediction of cis-regulatory elements and modules through integrative analysis of a large number of ChIP datasets
Source: PubMed Central journal article supplement (PMC4265420; doi:10.1186/1471-2164-15-1047), 2014-12-02

**A**

## Motifs of Umotif 67

## Motif of CG1378

## Motif of CG9019

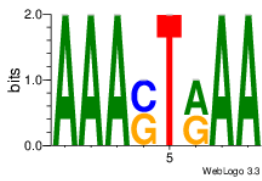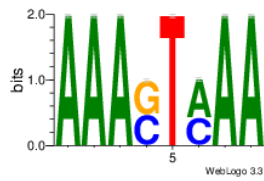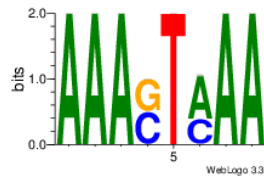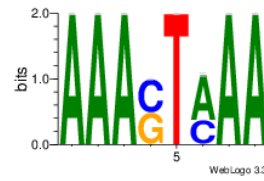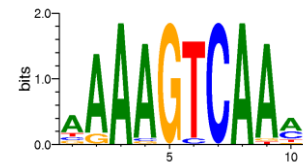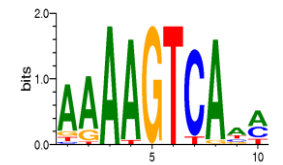

P-value 0.00053156

P-value 0.0006634

**B**

## Motifs of Umotif 27

## Motif of CG5249

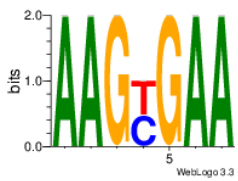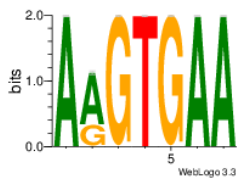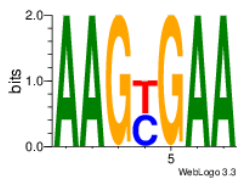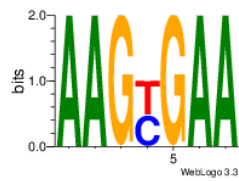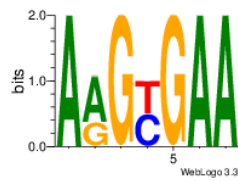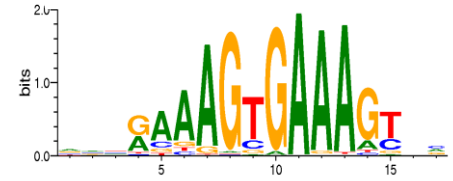

P-value 3.86014e-5

**C**

## Motifs of Umotif 70

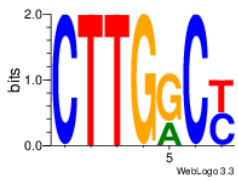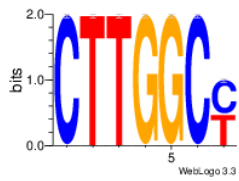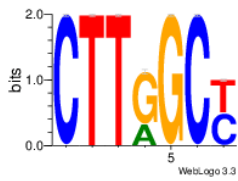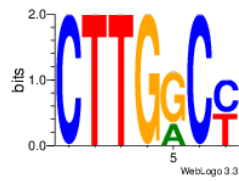**D**

## Motifs of Umotif 93

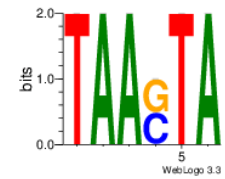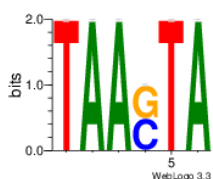

Supplement: 12864_2014_6723_MOESM10_ESM.pdf [file 12864_2014_6723_MOESM10_ESM.pdf]
