# Supplementary material for: De novo prediction of cis-regulatory elements and modules through integrative analysis of a large number of ChIP datasets
Source: PubMed Central journal article supplement (PMC4265420; doi:10.1186/1471-2164-15-1047), 2014-12-02

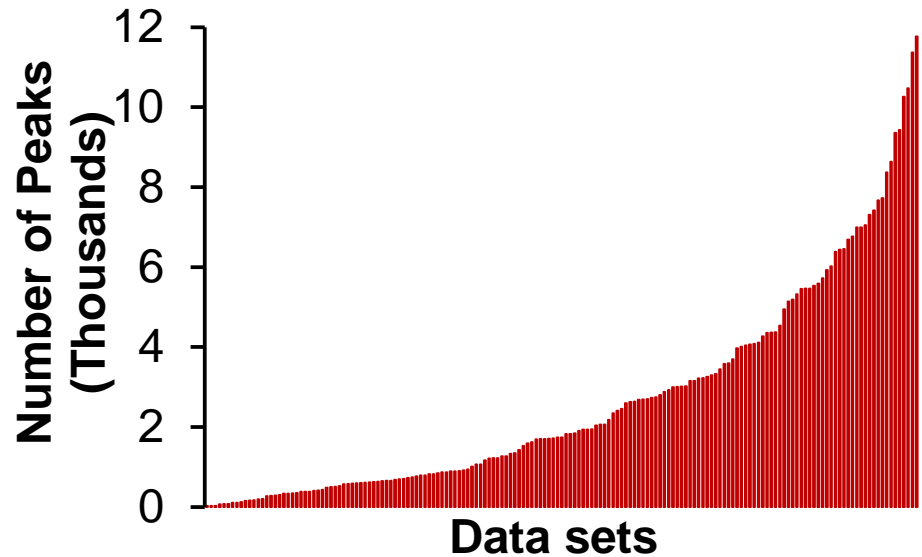

Supplement: 12864_2014_6723_MOESM2_ESM.pdf [file 12864_2014_6723_MOESM2_ESM.pdf]
