# Supplementary material for: De novo prediction of cis-regulatory elements and modules through integrative analysis of a large number of ChIP datasets
Source: PubMed Central journal article supplement (PMC4265420; doi:10.1186/1471-2164-15-1047), 2014-12-02
Supplement: 12864_2014_6723_MOESM11_ESM.pdf [file 12864_2014_6723_MOESM11_ESM.pdf]

**A**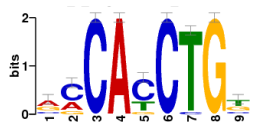

DA

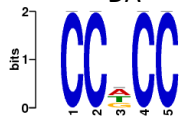

Umotif34

1014.17.55

**B**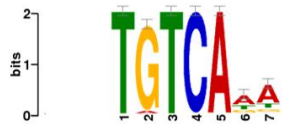

HTH

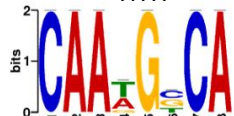

Umotif106

**C**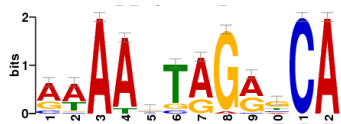

KNI

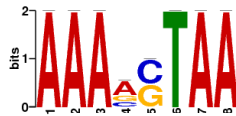

Umotif114

**D**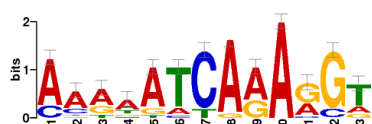

HR51

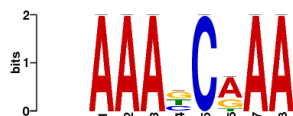

Umotif3

Torokm 14.4.2014.12:42

**E**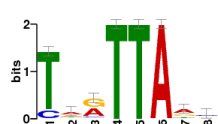

LBE

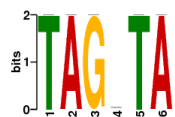

Umotif14

1502

**F**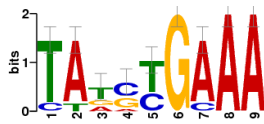

CF2

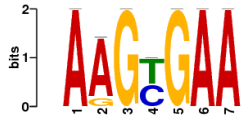

Umotif27

**G**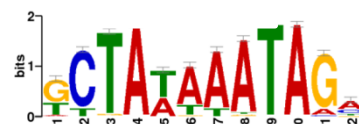

MEF2

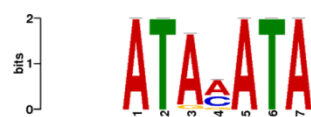

Umotif23
