# Supplementary material for: De novo prediction of cis-regulatory elements and modules through integrative analysis of a large number of ChIP datasets
Source: PubMed Central journal article supplement (PMC4265420; doi:10.1186/1471-2164-15-1047), 2014-12-02
Supplement: 12864_2014_6723_MOESM12_ESM.pdf [file 12864_2014_6723_MOESM12_ESM.pdf]

16,831 K

16,832 K

c31200492

16,832,500

16,833 K

16,833,500

16,834 K

Act57B

NM\_079076.3

NP\_523800.1

NM\_001169748.1

NP\_001163219.1

snoRNA:660

NR\_002549.1

PMC356969P12

PMC356969P12

PMC350549P3

PMC350549P3

LOC345651

LOC345651

PMC109445P1

PMC109445P1

Predicted CRM  
2R:16831599..16832019
